# Supplementary material for: Serum Metabolic Fingerprints on Bowl-Shaped Submicroreactor Chip for Chemotherapy Monitoring
Source: PubMed Central journal article supplement (PMC9007521; doi:10.1021/acsnano.1c09864), 2022-01-31
Supplement: nn1c09864_si_001.pdf [file nn1c09864_si_001.pdf]

Supplementary Materials for

## **Serum metabolic fingerprints on bowl-shaped submicroreactor chip for chemotherapy monitoring**

*Xia Yin,<sup>†,#</sup> Jing Yang,<sup>†,‡,#</sup> Mengji Zhang,<sup>†,‡,#</sup> Xinyao Wang,<sup>‡,#</sup> Wei Xu,<sup>†,‡</sup> Cameron-Alexander H.*

*Price,<sup>‡,§</sup> Lin Huang,<sup>†,‡</sup> Wanshan Liu,<sup>†,‡</sup> Haiyang Su,<sup>†,‡</sup> Wenjing Wang,<sup>†</sup> Hongyu Chen,<sup>‡</sup> Guangjin*

*Hou,<sup>‡</sup> Mark Walker,<sup>‡</sup> Ying Zhou,<sup>‡</sup> Zhen Shen,<sup>‡</sup> Jian Liu,<sup>‡,‡,\*</sup> Kun Qian,<sup>†,‡,\*</sup> and Wen Di<sup>†,\*</sup>*

<sup>†</sup>State Key Laboratory for Oncogenes and Related Genes, Shanghai Key Laboratory of Gynecologic Oncology, Department of Obstetrics and Gynecology, Renji Hospital, School of Medicine, Shanghai Jiao Tong University, Shanghai, 200127, P. R. China

<sup>‡</sup>School of Biomedical Engineering, and Med-X Research Institute, Shanghai Jiao Tong University, Shanghai, 200030, P. R. China

<sup>‡</sup>State Key Laboratory of Catalysis, Dalian Institute of Chemical Physics, Chinese Academy of Sciences, Dalian, Liaoning, 116023, P. R. China

<sup>‡</sup>The University of Manchester at Harwell, Diamond Light Source, Didcot, Oxfordshire, OX11 0DE, UK

<sup>§</sup>UK Catalysis Hub, Research Complex at Harwell, Rutherford Appleton Labs, Harwell Campus, Didcot, Oxfordshire, OX11 0FA, UK

<sup>‡</sup>Department of Obstetrics and Gynecology, University of Ottawa, Ottawa, Ontario, ON K1H 8L6, Canada

<sup>‡</sup>Department of Obstetrics and Gynecology, The First Affiliated Hospital of USTC, Division of Life Sciences and Medicine, University of Science and Technology of China, Hefei, Anhui, 230001, P. R. China

<sup>‡</sup>DICP-Surrey Joint Centre for Future Materials, Department of Chemical and Process Engineering, and Advanced Technology Institute, University of Surrey, Guilford, Surrey, GU2 7XH, UK

\*Corresponding author. Email: [jian.liu@surrey.ac.uk](mailto:jian.liu@surrey.ac.uk); [k.qian@sjtu.edu.cn](mailto:k.qian@sjtu.edu.cn); [diwen@renji.com](mailto:diwen@renji.com)

# These authors contributed equally to this work.

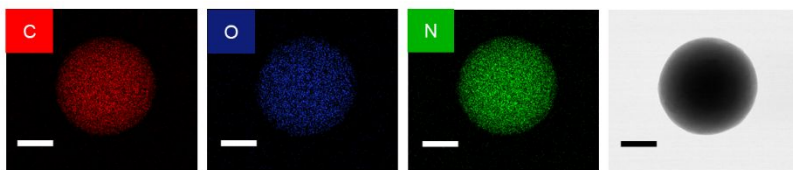

**Supporting Figure 1. The elemental mapping characterization of APF-sphere.** The elements of C, O, and N are indicated by red, blue, and green. The scale bar is 100 nm.

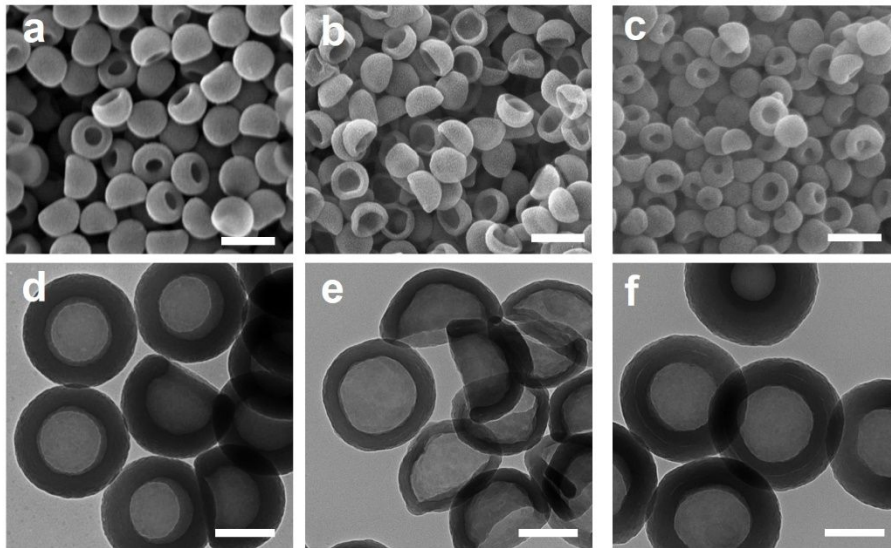

**Supporting Figure 2. The characterization of APF-bowl obtained by solvent-assisted repolymerization process for 5 min (a, d), 20 min (b, e), and 180 min (c, f). The scanning electron microscopy (SEM) images (a-c, Scale bar, 500 nm) and transmission electron microscopy (TEM) images (d-f, Scale bar, 200 nm), respectively.**

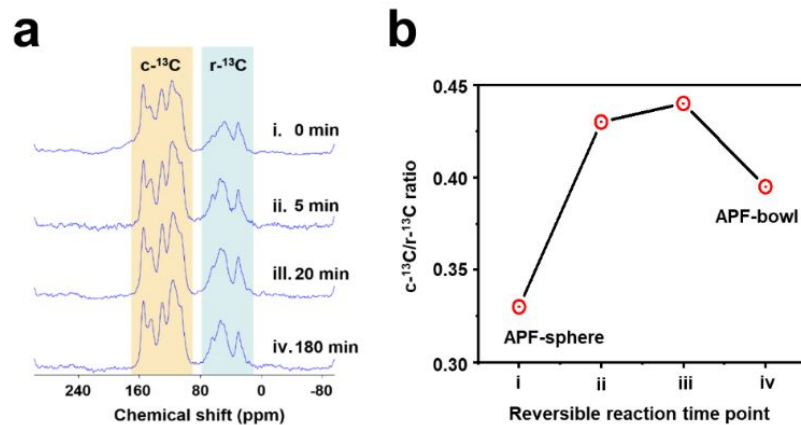

**Supporting Figure 3. The characterization of  $^{13}\text{C}$  nuclear magnetic resonance ( $^{13}\text{C}$  NMR).**

(a)  $^{13}\text{C}$  CP/MAS NMR spectra of APF-sphere (0 min) and APF-bowl obtained after the reaction time of 5 min, 20 min, and 180 min. The  $c\text{-}^{13}\text{C}$  and  $r\text{-}^{13}\text{C}$  refer to the carbon content ratio on the branched-chain and benzene ring, respectively. (b) Trend diagram of  $c\text{-}^{13}\text{C}/r\text{-}^{13}\text{C}$  ratio of samples in reversible de/re-polymerization process, which reaction time was (i) 0 min, (ii) 5 min, (iii) 20 min, and (iv) 180 min.

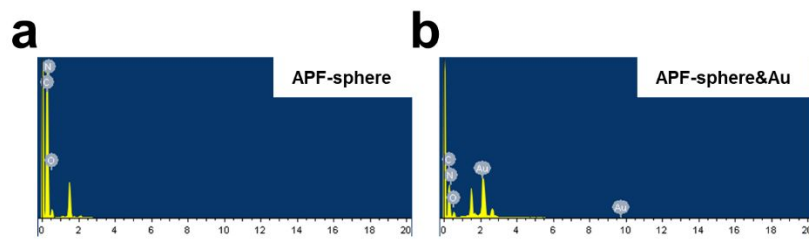

**c**

| Materials     | Weight (%) |       |       |       | Atomic (%) |       |       |      |
|---------------|------------|-------|-------|-------|------------|-------|-------|------|
|               | C          | N     | O     | Au    | C          | N     | O     | Au   |
| APF-sphere    | 70.4       | 13.83 | 15.77 | /     | 74.82      | 12.6  | 12.58 | /    |
| APF-sphere&Au | 37.41      | 6.73  | 8.71  | 47.15 | 71.13      | 10.97 | 12.43 | 5.47 |

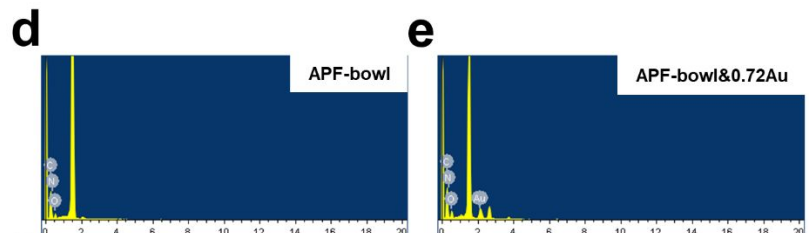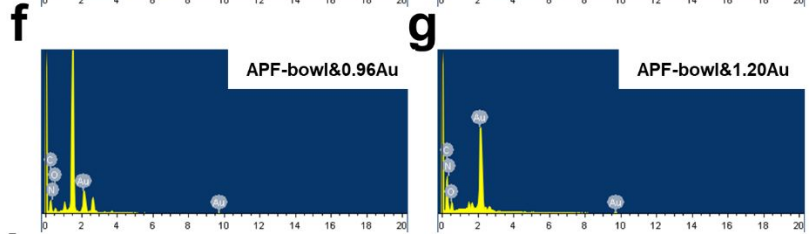

**h**

| Materials       | Weight (%) |       |       |       | Atomic (%) |       |       |      |
|-----------------|------------|-------|-------|-------|------------|-------|-------|------|
|                 | C          | N     | O     | Au    | C          | N     | O     | Au   |
| APF-bowl        | 48.29      | 21.9  | 29.81 | /     | 53.98      | 20.99 | 25.02 | /    |
| APF-bowl&0.72Au | 45.17      | 14.08 | 23.93 | 16.82 | 59.25      | 15.84 | 23.57 | 1.35 |
| APF-bowl&0.96Au | 30.05      | 8.86  | 14.33 | 46.76 | 58.62      | 14.82 | 20.99 | 5.56 |
| APF-bowl&1.20Au | 26.26      | 6.57  | 8.20  | 58.98 | 63.06      | 13.52 | 14.78 | 8.64 |

**Supporting Figure 4. The energy dispersive X-ray spectra (EDS) characterization of sphere-shaped and bowl-shaped chips.** The EDS of APF-sphere and APF-sphere&Au are displayed in (a) and (b), respectively. The elemental contents of C, N, O, and Au are summarized in Supporting Figure 4c. The EDS of APF-bowl, APF-bowl&0.72Au, APF-bowl&0.96Au, and APF-bowl&1.20Au, are displayed in (d), (e), (f) and (g), respectively. The elemental contents of C, N, O, and Au are summarized in Supporting Figure 4h.

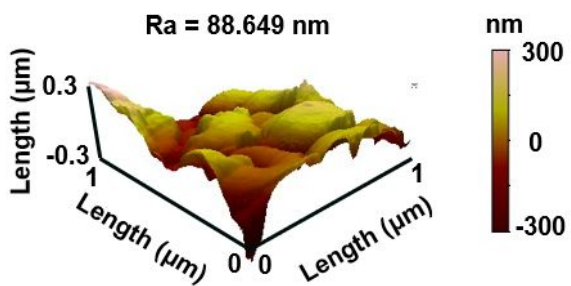

Supporting Figure 5. The 3D plot of atomic force microscopy (AFM) image for the characterization of the APF-bowl&0.96Au surface roughness.

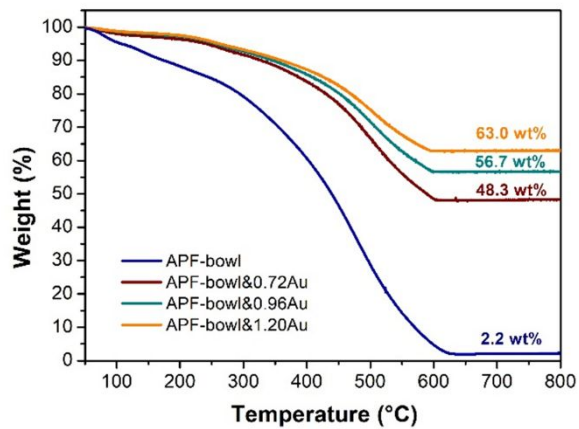

**Supporting Figure 6. The thermogravimetric (TG) characterizations of APF-bowl and APF-bowl&MAu ( $M = 0.72, 0.96, 1.20$ ).**

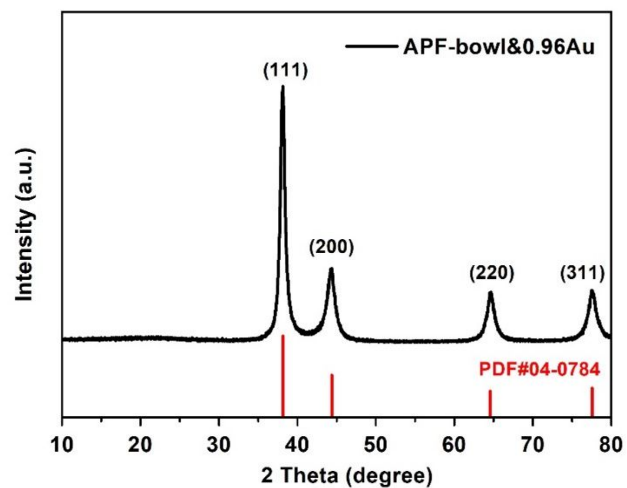

**Supporting Figure 7. The X-ray Diffraction (XRD) pattern of APF-bowl&0.96Au.** The typical peaks at  $2\theta$  of  $38.2^\circ$ ,  $44.4^\circ$ ,  $64.6^\circ$ , and  $77.5^\circ$  were assigned to rings of (111), (200), (220) and (311) of Au.



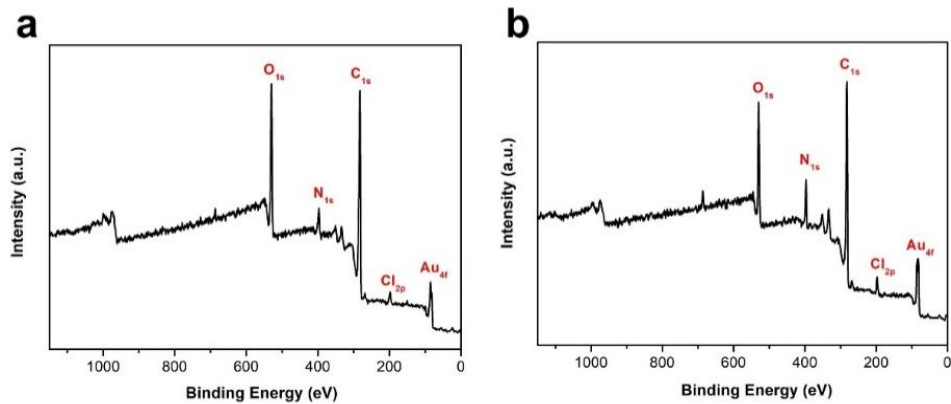

**Supporting Figure 8. The X-ray photoelectron spectroscopy (XPS) characterization.** The full spectra of (a) APF-sphere&Au and (b) APF-bowl&Au, are displayed, respectively.

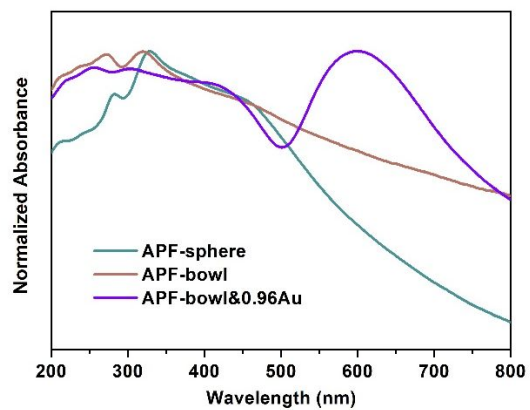

**Supporting Figure 9. Ultraviolet-visible (UV-vis) absorbance spectra of APF-sphere, APF-bowl, and APF-bowl&0.96Au.**

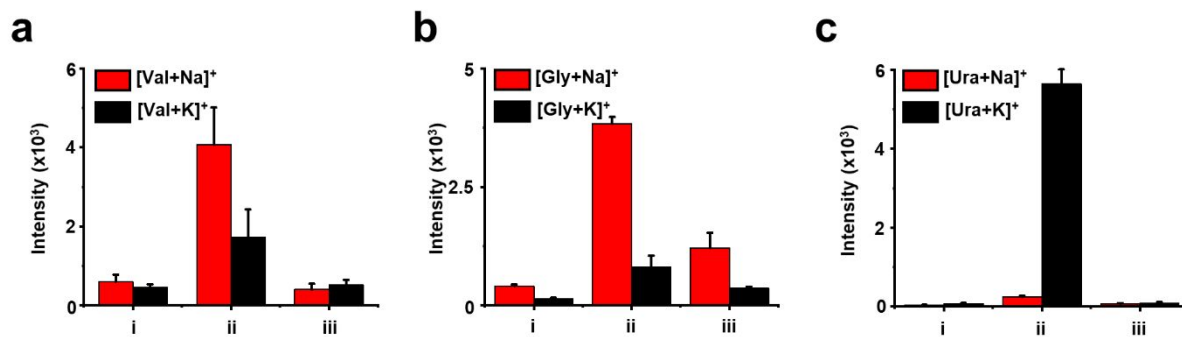

**Supporting Figure 10. The bar graph of laser desorption/ionization mass spectrometry (LDI MS) detection.** Mean signal intensities of sodium and potassium adducted ( $[M+Na]^+$  and  $[M+K]^+$ ) signals of (a) valine, (b) glycyl-glycine, and (c) uracil, by using the matrix of (i) APF-sphere&0.72Au, (ii) APF-sphere&0.96Au, and (iii) APF-sphere&1.20Au. Three independent LDI MS experiments were conducted, and the small metabolites were at a concentration of 1 ng/nL.

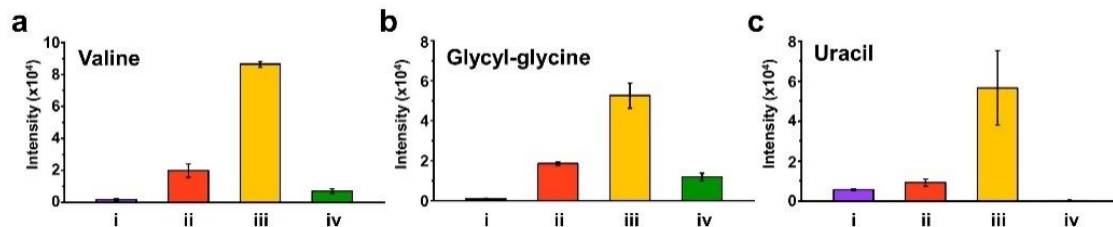

**Supporting Figure 11. The bar graph of LDI MS detection.** Mean signal intensities of potassium adducted ( $[M+K]^+$ ) signals of (a) valine, (b) glycyl-glycine, and (c) uracil, by using the matrix of (i) APF-sphere&Au, (ii) APF-bowl&0.72Au, (iii) APF-bowl&0.96Au, and (iv) APF-bowl&1.20Au. Three independent LDI MS experiments were conducted, and the small metabolites were at a concentration of 1 ng/nL.

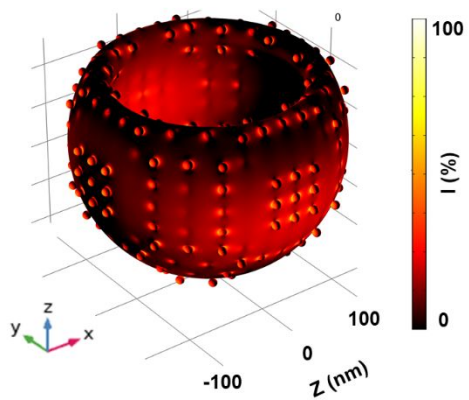

**Supporting Figure 12. The uniform distribution of Au nanoparticles was adopted for calculating the space of neighboring Au nanoparticles in APF-bowl&0.96Au, which was 25.83 nm.**

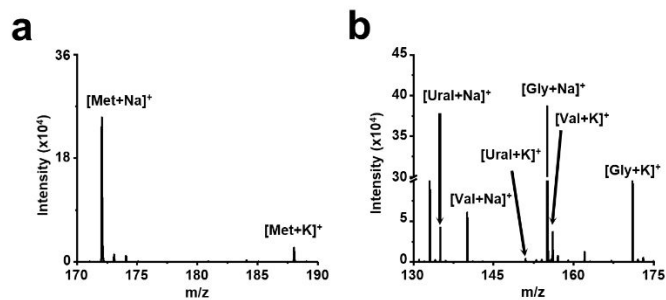

**Supporting Figure 13. The protein tolerance of APF-bowl&0.96Au in LDI MS detection. (a)** The mass spectrum of the mixture of methionine (Met, 1 ng/nL) and BSA (5mg/mL). **(b)** The mass spectrum of the mixture of BSA (5mg/mL) and typical small metabolites (including valine (Val), glycyl-glycine (Gly), and uracil (Ura), each at a concentration of 1 ng/nL). The sodium adducts ( $[M+Na]^+$ ) and potassium adducts ( $[M+K]^+$ ) of small metabolites were labeled in the figure.

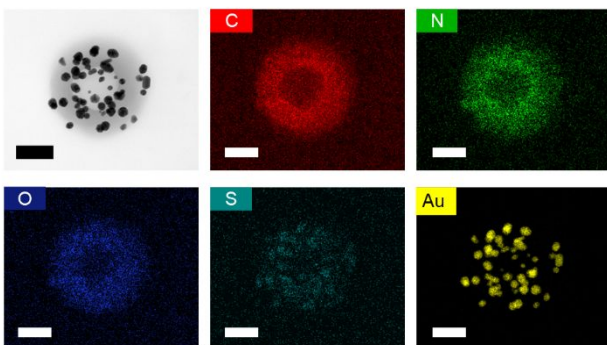

**Supporting Figure 14. The elemental mapping characterizations.** Elemental mappings of C, N, O, Au, and S for a submicroreactor-methionine mixture. The scale bars were 100 nm.

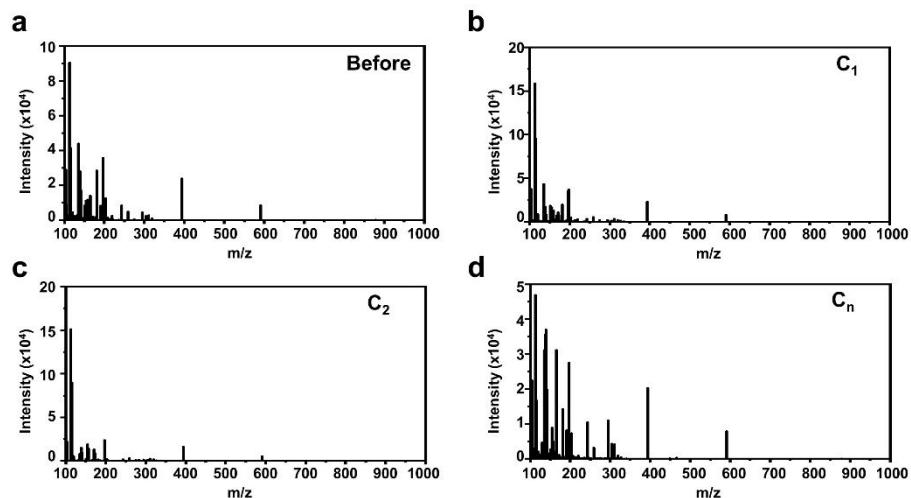

**Supporting Figure 15. The typical MS spectra of ovarian cancer patients before and after chemotherapy.** The MS spectrum of an ovarian cancer patient (a) before chemotherapy, (b) after cycle 1 chemotherapy ( $C_1$ ), (c) after cycle 2 chemotherapy ( $C_2$ ), and (d) after cycle  $n$  chemotherapy ( $C_n$ ,  $n \geq 5$ ), by using APF-bowl&0.96Au as the matrix. The LDI MS experiments were all conducted in the positive ion mode, and the matrix suspension of APF-bowl&0.96Au was 1 ng/nL.



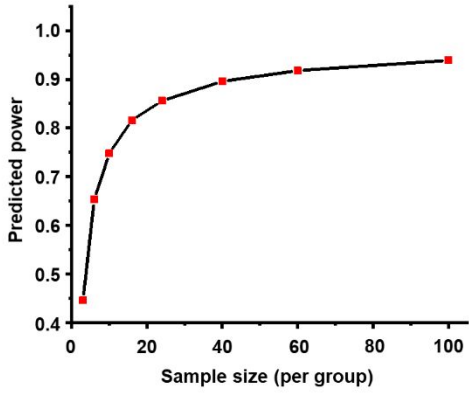

**Supporting Figure 16. Power analysis based on a pilot dataset.** The 10 SMFs (5/5, before chemotherapy/after chemotherapy) were analyzed to obtain the minimum required sample for a robust machine learning model. The minimum sample size of 16 per group will achieve a predicted power of  $\sim 0.8$ .

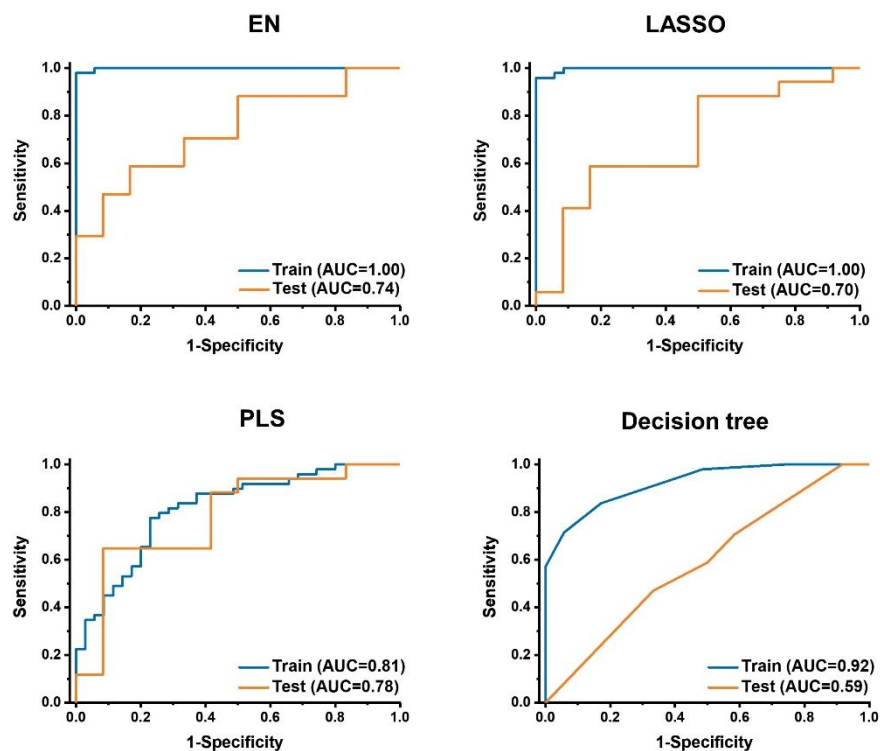

**Supporting Figure 17. Machine learning of serum metabolic fingerprints (SMFs) for differentiation between the ovarian cancer patients before chemotherapy and in  $C_1$  group.** The machine learning methods of (a) elastic net (EN), (b) the least absolute shrinkage and selection operator (LASSO), (c) partial least squares (PLS), and (d) decision tree, were respectively applied. The PLS was demonstrated as the best candidate for differentiation of patients before chemotherapy and patients in  $C_1$  group. The receiver operating characteristics (ROC) curves of training and test set are respectively presented in blue and yellow with area-under-the-curve (AUC) labeled.

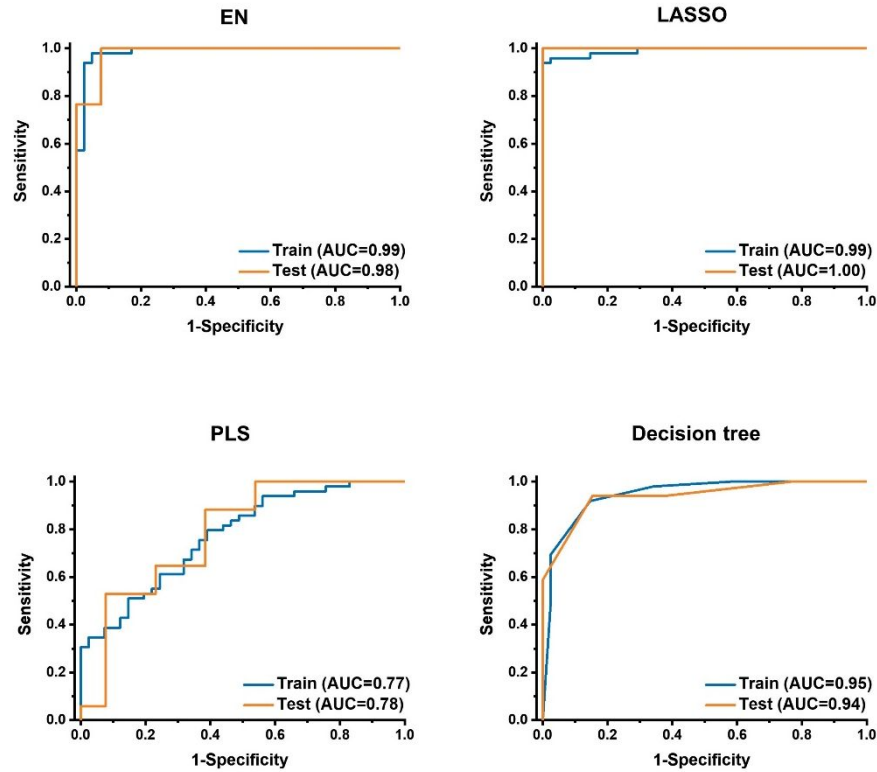

**Supporting Figure 18. Machine learning of SMFs for differentiation between the ovarian cancer patients before chemotherapy and in C<sub>2</sub> group.** The machine learning method of (a) EN, (b) LASSO, (c) PLS, and (d) decision tree, were respectively applied. LASSO was demonstrated as the best candidate for differentiation of patients before chemotherapy and in C<sub>2</sub> group. The ROC curves of training and test set are respectively presented in blue and yellow with AUC labeled.

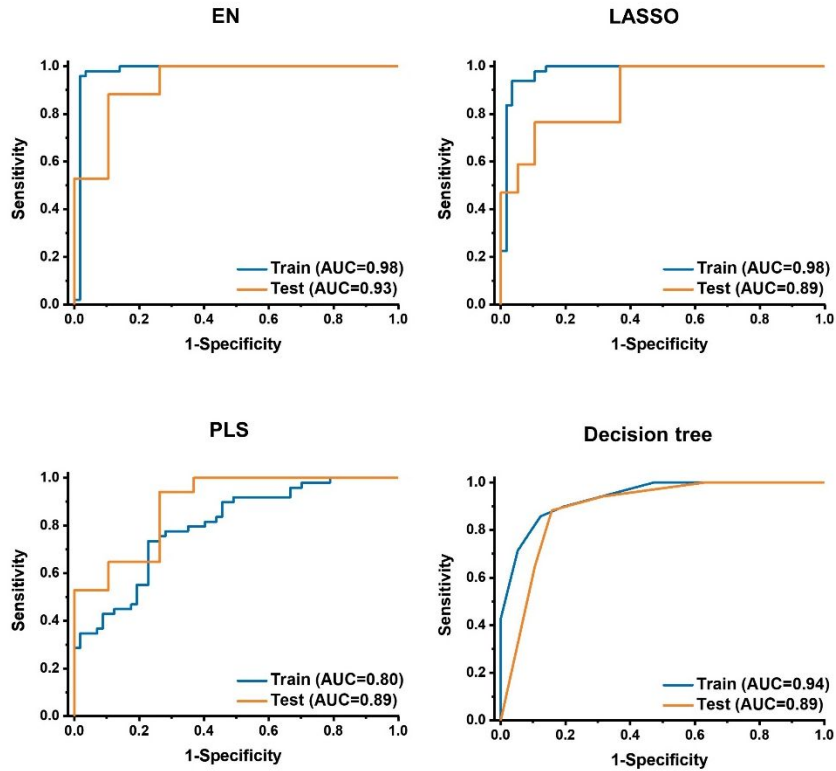

**Supporting Figure 19. Machine learning of SMFs for differentiation between the ovarian cancer patients before chemotherapy and in  $C_n$  group.** The machine learning methods of (a) EN, (b) LASSO, (c) PLS, and (d) decision tree, were respectively applied. LASSO was demonstrated as the best candidate for differentiation of patients before chemotherapy and in  $C_n$  group. The ROC curves of training and test set are respectively presented in blue and yellow with AUC labeled.

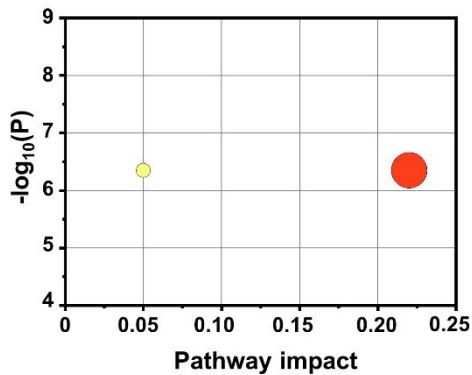

**Supporting Figure 20. The pathway analysis based on the established biomarker panel for chemotherapy monitoring.** Two pathways were identified to correlate with the established metabolic biomarker panel (Supporting Table 6), in which the glyoxylate and dicarboxylate metabolism with pathway impact of 0.22 are presented in the red circle and (2) Glycine, serine, and threonine metabolism with pathway impact of 0.05 were presented in the yellow circle. The size of the circle correlates with corresponding pathway impact.

**Supporting Table 1. The diverse biomedical applications by regulating surface roughness.**

| No.             | Reference                                                                      | Materials with surface roughness                         | Property                                                                                                                                          | Biomedical Application                   |
|-----------------|--------------------------------------------------------------------------------|----------------------------------------------------------|---------------------------------------------------------------------------------------------------------------------------------------------------|------------------------------------------|
| This study      | —                                                                              | APF-bowl&0.96Au                                          | Increased adsorption site and high selectivity for metabolites, and plasmon transfer within the nano-scaled cavities to facilitate LDI efficiency | Submicroreactor for metabolite detection |
| <b>Ref (1)</b>  | Wang <i>et al. Adv. Healthcare Mater.</i> <b>2018</b> , 7, 1800318             | The mixture of Mg particles and gallium-indium alloy     | Excellent thermal conductivity, favorable formability, and benign biocompatibility                                                                | Photothermal therapy                     |
| <b>Ref (2)</b>  | Chen <i>et al. ACS Nano</i> <b>2018</b> , 12, 6, 5646–5656                     | Rattle-structured rough nanocapsules (Au@HSN-PGEA, AHPs) | Desirable surface roughness and NIR responsiveness                                                                                                |                                          |
| <b>Ref (3)</b>  | Song <i>et al. ACS Nano</i> <b>2017</b> , 11, 6, 6102-6113                     | Branched nanoporous gold nanoshells                      | Enhanced physico-optical properties for laser irradiation triggered drug release                                                                  | Drug/cellular delivery                   |
| <b>Ref (4)</b>  | Niu <i>et al. Adv. Mater.</i> <b>2013</b> , 25, 43, 6233-6237                  | Nanoparticles mimicking virus surface topography         | Enhanced biomolecules binding and cellular uptake efficacy                                                                                        |                                          |
| <b>Ref (5)</b>  | Kocer <i>et al. Adv. Mater.</i> <b>2017</b> , 29, 27, 1606407                  | Light responsive liquid crystal polymer networks         | Switched cell migration patterns upon in situ temporal changes in surface nano-roughness                                                          | Cell adhesion, migration, and regulation |
| <b>Ref (6)</b>  | Zhou <i>et al. J. Mater. Chem. B</i> <b>2015</b> , 3, 4439-4450                | Ultrafine poly(L-lactic acid) (PLLA) microfibers         | Anisotropic wettability and greater protein adsorption                                                                                            |                                          |
| <b>Ref (7)</b>  | Li <i>et al. ACS Appl. Mater. Interfaces</i> <b>2021</b> , 13, 27, 32205–32216 | Stimuli-responsive lysozyme nanocapsules (NCP)           | Remarkably reduced adsorption of proteins, polysaccharides, and bacteria                                                                          | Antibacterial                            |
| <b>Ref (8)</b>  | Xu <i>et al. J. Hazard Mater.</i> <b>2018</b> , 5, 343, 285-297                | PET fabrics coated with TiO <sub>2</sub> nanowires       | Excellent UV photocatalytic activity                                                                                                              |                                          |
| <b>Ref (9)</b>  | Duy <i>et al. Nanoscale</i> , <b>2019</b> , 11, 16455-16462                    | Si nanopillar array                                      | Against Gram-negative Pseudomonas and Staphylococcus aureus due to nanostructure-induced rupture.                                                 |                                          |
| <b>Ref (10)</b> | Shi <i>et al. Small</i> <b>2018</b> , 14, 27, e1800819                         | Lotus leaf onto PDMS substrates                          | Increased contact area and high sensitivity as a flexible piezoresistive pressure sensor                                                          | Sensors                                  |
| <b>Ref (11)</b> | Qi <i>et al. Sens. Actuators B Chem.</i> <b>2019</b> , 279, 170-176            | 3D sulfur/nitrogen co-doped graphene                     | Detection of catechol and hydroquinone with low detection limits                                                                                  |                                          |
| <b>Ref</b>      | Shu <i>et al. Small</i>                                                        | Au nanoparticles                                         | Fast, sensitive, and selective                                                                                                                    |                                          |

|             |                                               |                                         |                                |  |
|-------------|-----------------------------------------------|-----------------------------------------|--------------------------------|--|
| <b>(12)</b> | <i>Methods</i> <b>2020</b> , 4,<br>4, 1900469 | deposited on a<br>dopamine-bubble layer | detection of small metabolites |  |
|-------------|-----------------------------------------------|-----------------------------------------|--------------------------------|--|

**Supporting Table 2. Comparison between the present APF-bowl&Au with previous reported anisotropic morphologies as LDI MS matrix.**

| No.        | Reference                                                                          | Matrix                                                                         | Substrate                    | Property for LDI MS detection                                                                          | Detected molecules                                         | Application                 |
|------------|------------------------------------------------------------------------------------|--------------------------------------------------------------------------------|------------------------------|--------------------------------------------------------------------------------------------------------|------------------------------------------------------------|-----------------------------|
| This study | —                                                                                  | APF-bowl&Au                                                                    | APF-bowl                     | Enhanced laser desorption/ionization efficiency and desirable adsorption of small molecule metabolites | Serum metabolic fingerprints (MW < 1000 Da)                | Chemotherapy monitoring     |
| Ref (13)   | Tseng <i>et al. Anal. Chem.</i> <b>2018</b> , 90 (12), 7283-7291                   | Self-Assembled Chiral Gold Supramolecules                                      | —                            | High absorption efficiency of laser energy, analyte-binding capacity, and homogeneity                  | Carnitine (MW > 1000 Da)                                   | Targeted molecule detection |
| Ref (14)   | Yoon <i>et al. Chem. Comm.</i> <b>2018</b> , 54 (45), 5688-5691                    | Donut-shaped C18-Au surface                                                    | Au surface                   | Simplified sample preparation process                                                                  | Neuropeptide (MW > 1000 Da)                                |                             |
| Ref (15)   | Li <i>et al. Chem. Comm.</i> <b>2019</b> , 55 (15), 2166-2169                      | Au nanobowls                                                                   | Au nanobowls                 | High stability with reduced analysis time                                                              | Oligonucleotides (MW > 1000 Da)                            |                             |
| Ref (16)   | Ge <i>et al. J. Chromatogr. A.</i> <b>2020</b> , 1615.                             | Apatamer-Au doped COFs                                                         | COFs                         | Selective and satisfactory extraction property to insulin                                              | Insulin (MW > 1000 Da)                                     |                             |
| Ref (17)   | Huang <i>et al. Anal. Chem.</i> <b>2018</b> , 90 (14), 8607-8615.                  | Au/diphenylalanine nanosheets                                                  | Diphenylalanine nanosheets   | Laser light absorption ability                                                                         | Anabolic steroids and estrogens (MW < 1000 Da)             |                             |
| Ref (18)   | Wang <i>et al. ACS Appl. Mater. Interfaces</i> <b>2020</b> , 12 (38), 42567-42575. | Porous TiO <sub>2</sub> film immobilized with gold nanoparticles (AuNPs-FPTDF) | Porous TiO <sub>2</sub> film | High detection sensitivity, good repeatability, and low background noise                               | Various small molecules (e.g., amino acids) (MW < 1000 Da) |                             |
| Ref (19)   | Kim <i>et al. Small</i> <b>2021</b> , 17 (49), 2103745                             | Au nanoisland functionalized ZnO nanotubes (AuNI-ZNTs).                        | ZnO nanotubes                | Favorable desorption process                                                                           | Fatty acids and monosaccharides (MW < 1000 Da)             |                             |
| Ref (20)   | Kim <i>et al. Adv. Funct. Mater.</i> <b>2021</b> , 31 (29), 2102475.               | Au-modified TiO <sub>2</sub> nanowires (npAu-TNW)                              | TiO <sub>2</sub> nanowires   | Efficient photo thermal conversion                                                                     | Neurotransmitter (MW < 1000 Da)                            |                             |
| Ref (21)   | Kim <i>et al. ACS Appl. Mater. Interfaces</i> <b>2019</b> , 11 (22), 20509-20520   | Au nanoislands/TiO <sub>2</sub> nanowires                                      | TiO <sub>2</sub> nanowires   | Improved desorption and ionization performance of the heterostructure                                  | Immunosuppressors (MW < 1000 Da)                           |                             |



|                 |                                                                         |                                    |                          |                                                                                 |                                       |                               |
|-----------------|-------------------------------------------------------------------------|------------------------------------|--------------------------|---------------------------------------------------------------------------------|---------------------------------------|-------------------------------|
| <b>Ref (22)</b> | Li <i>et al.</i> <i>J. Hazard. Mater.</i> <b>2022</b> , 423, 126893     | AuNPs/NiFe-LDHs                    | NiFe-LDHs                | High peak intensity and low background noise                                    | Metronidazole (MW < 1000 Da)          |                               |
| <b>Ref (23)</b> | Alexandra <i>et al.</i> <i>ACS Nano</i> <b>2020</b> , 14 (6), 6785-6794 | Au-coated black silicon substrates | Black silicon substrates | Efficient transference of metabolites from the tissues to the substrate surface | Animal tissues and human fingerprints | Untargeted molecule detection |

**Supporting Table 3. The intensity of typical small molecule metabolites by LDI MS detection.**

| Analyte <sup>[1]</sup> | Matrix <sup>[2]</sup> | [M+Na] <sup>+</sup>      |                    | [M+K] <sup>+</sup>       |                    |
|------------------------|-----------------------|--------------------------|--------------------|--------------------------|--------------------|
|                        |                       | Intensity <sup>[3]</sup> | S/N <sup>[4]</sup> | Intensity <sup>[3]</sup> | S/N <sup>[4]</sup> |
| Valine                 | APF-bowl              | 98.24±9.91               | <3                 | 71.33±18.58              | <3                 |
|                        | APF-bowl&0.72Au       | 25009.70±706.00          | 38.33±8.08         | 19847.00±4105.37         | 22.67±2.08         |
|                        | APF-bowl&0.96Au       | 84296.30±3165.98         | 452.33±35.73       | 86458.70±1740.00         | 368±54.81          |
|                        | APF-bowl&1.20Au       | 12798.00±605.31          | 197.00±25.94       | 7022.33±1412.69          | 90.00±8.54         |
|                        | APF-sphere&Au         | 4075.33±936.84           | 105.00±19.05       | 1724.00±705.82           | 42.33±16.92        |
| Glucose                | APF-bowl              | 14.33±4.04               | <3                 | 8.67±4.62                | <3                 |
|                        | APF-bowl&0.72Au       | 22110.43±2226.08         | 13.17±3.65         | 6928.56±2044.43          | <3                 |
|                        | APF-bowl&0.96Au       | 31812.11±628.43          | 22.97±6.96         | 7527.68±1153.59          | <3                 |
|                        | APF-bowl&1.20Au       | 11596.84±710.45          | 4.77±1.46          | 7020.84±1096.67          | <3                 |
|                        | APF-sphere&Au         | 311.00±52.68             | 4                  | 369.33±79.22             | 4.67±0.58          |
| Decanoic acid          | APF-bowl              | 2.67±1.15                | <3                 | 2.00±2.00                | <3                 |
|                        | APF-bowl&0.72Au       | 2554.67±211.68           | <3                 | 6383.89±2327.44          | 13.67±3.43         |
|                        | APF-bowl&0.96Au       | 4873.83±650.27           | 6.53±0.93          | 23072.09±2143.88         | 28.20±2.31         |
|                        | APF-bowl&1.20Au       | 1389.84±236.56           | 7.95±0.21          | 7120.56±1938.47          | 40.57±8.00         |
|                        | APF-sphere&Au         | 25.00±10.15              | <3                 | 454.60±132.26            | 39.40±11.78        |
| Glycyl-glycine         | APF-bowl              | 8.33±6.03                | <3                 | 3.67±4.62                | <3                 |
|                        | APF-bowl&0.72Au       | 79122.19±703.42          | 552.83±72.79       | 18469.92±854.70          | 103.90±13.57       |
|                        | APF-bowl&0.96Au       | 102523.00±3693.55        | 895.37±122.61      | 52491.24±6294.13         | 353.77±59.98       |
|                        | APF-bowl&1.20Au       | 47228.93±2711.96         | 423.83±99.95       | 11814.52±1894.13         | 83.53±25.27        |
|                        | APF-sphere&Au         | 3840.57±136.77           | 121.07±23.85       | 805.29±240.54            | 22.80±1.92         |
| Uracil                 | APF-bowl              | 10.33±3.51               | <3                 | 1.67±1.53                | <3                 |
|                        | APF-bowl&0.72Au       | 1648.97±471.5            | 16.10±5.52         | 9156.38±1776.74          | 65.30±13.40        |
|                        | APF-bowl&0.96Au       | 10079.41±2383.43         | 127.73±61.05       | 56563.98±18589.20        | 550.30±301.43      |
|                        | APF-bowl&1.20Au       | 395.67±43.94             | <3                 | 274.2±17.36              | 9.30±0.14          |
|                        | APF-sphere&Au         | 242.09±33.81             | 6.80±1.90          | 5636.52±370.03           | 132.90±40.07       |
| Leucine                | APF-bowl              | 9±2.65                   | <3                 | 10.00±4.36               | <3                 |
|                        | APF-bowl&0.72Au       | 1739.34±636.98           | 159.17±60.71       | 836.9±419.77             | 74.80±36.63        |
|                        | APF-bowl&0.96Au       | 2738.58±1729.88          | 227.4±146.09       | 7056.78±2583.48          | 592.20±223.28      |
|                        | APF-bowl&1.20Au       | 1369.22±282.99           | 121.07±23.23       | 533.95±150.17            | 46.43±13.06        |
|                        | APF-sphere&Au         | 45.08±19                 | 4.2±1.9            | 175.62±32.97             | 16.40±2.46         |

<sup>[1]</sup> Six typical metabolites in human serum, including valine, glucose, decanoic acid, glycyl-glycine, uracil, and leucine, were utilized for evaluating the detection performance of different matrices in LDI MS.

<sup>[2]</sup> The matrices, including APF-bowl, APF-bowl&0.72Au, APF-bowl&0.96Au, APF-bowl&1.20Au, and APF-sphere&Au, were applied for LDI MS detection with the concentration of 1 ng/nL.

<sup>[3]</sup> The intensity of sodium and potassium adducts of small molecule metabolites ( $[M+Na]^+$  and  $[M+K]^+$ ) was calculated by three independent experiments with standard deviation.

<sup>[4]</sup> S/N refers to the signal to noise ratio of sodium and potassium adducts of small molecule metabolites, which was calculated by three independent experiments with standard deviation.

**Supporting Table 4. The total ion count (TIC) of mass spectra from a representative serum sample of an ovarian cancer patient.**

| Matrix          | TIC     |         |         |                        |
|-----------------|---------|---------|---------|------------------------|
|                 | 1       | 2       | 3       | Average <sup>[1]</sup> |
| APF-sphere&Au   | 739900  | 710963  | 643666  | 698177±49375           |
| APF-bowl&0.72Au | 1443224 | 1350514 | 1342195 | 1378644±56082          |
| APF-bowl&0.96Au | 5889989 | 6108490 | 6594293 | 6197590±360507         |
| APF-bowl&1.20Au | 956918  | 955830  | 976908  | 963219±11868           |

<sup>[1]</sup> The averaged TIC with standard deviation was calculated based on three independent experiments.

**Supporting Table 5. Demographic information and clinical feature of ovarian cancer patients.**

| Patient ID | Age | Physiological type <sup>[1]</sup> | Disease stage <sup>[2]</sup> | Serum sample available <sup>[3]</sup> |                |                |                |
|------------|-----|-----------------------------------|------------------------------|---------------------------------------|----------------|----------------|----------------|
|            |     |                                   |                              | Before                                | C <sub>1</sub> | C <sub>2</sub> | C <sub>n</sub> |
| 1          | 57  | MOC                               | IIC                          | √                                     |                |                | √              |
| 2          | 60  | HGSOC                             | II                           | √                                     | √              |                | √              |
| 3          | 49  | HGSOC                             | IV                           | √                                     | √              | √              |                |
| 4          | 57  | HGSOC                             | IA                           | √                                     |                | √              |                |
| 5          | 52  | HGSOC                             | III                          | √                                     | √              | √              |                |
| 6          | 52  | HGSOC                             | IV                           | √                                     |                | √              |                |
| 7          | 70  | HGSOC                             | IIIC                         | √                                     | √              |                |                |
| 8          | 61  | HGSOC                             | IIIC                         | √                                     | √              | √              |                |
| 9          | 56  | HGSOC                             | IIIC                         | √                                     | √              |                |                |
| 10         | 56  | HGSOC                             | IIIC                         | √                                     |                | √              | √              |
| 11         | 62  | HGSOC                             | IIIC                         | √                                     |                |                | √              |
| 12         | 75  | HGSOC                             | IIIC                         | √                                     | √              |                |                |
| 13         | 63  | HGSOC                             | IC                           | √                                     | √              |                | √              |
| 14         | 51  | HGSOC                             | IC                           | √                                     | √              | √              |                |
| 15         | 65  | EOC                               | IA                           | √                                     |                | √              |                |
| 16         | 54  | HGSOC                             | IA                           | √                                     |                |                | √              |
| 17         | 67  | HGSOC                             | IV                           | √                                     | √              |                | √              |
| 18         | 65  | HGSOC                             | IIB                          | √                                     |                | √              |                |
| 19         | 74  | OCCC                              | IIIC                         | √                                     | √              | √              | √              |
| 20         | 61  | HGSOC                             | IIB                          | √                                     |                | √              | √              |
| 21         | 61  | HGSOC                             | IIIC                         | √                                     | √              | √              |                |
| 22         | 46  | HGSOC                             | IIIC                         | √                                     | √              |                | √              |
| 23         | 56  | HGSOC                             | IIIC                         | √                                     | √              | √              |                |
| 24         | 64  | HGSOC                             | IIIC                         | √                                     | √              | √              | √              |
| 25         | 48  | HGSOC                             | IIA                          | √                                     | √              | √              |                |
| 26         | 50  | HGSOC                             | IC                           | √                                     | √              | √              |                |
| 27         | 60  | HGSOC                             | IC                           | √                                     | √              | √              | √              |
| 28         | 60  | HGSOC                             | IIB                          | √                                     | √              | √              |                |
| 29         | 64  | HGSOC                             | IA                           | √                                     | √              | √              | √              |
| 30         | 65  | HGSOC                             | IIIC                         | √                                     |                | √              | √              |
| 31         | 49  | HGSOC                             | IIIC                         | √                                     | √              | √              |                |
| 32         | 63  | HGSOC                             | IV                           | √                                     | √              | √              | √              |
| 33         | 80  | HGSOC                             | IIIC                         | √                                     | √              | √              |                |
| 34         | 36  | HGSOC                             | IC                           | √                                     |                | √              |                |
| 35         | 37  | OCCC                              | IIIC                         | √                                     | √              | √              | √              |
| 36         | 71  | LGSOC                             | III                          | √                                     | √              | √              | √              |
| 37         | 30  | HGSOC                             | IIIC                         | √                                     | √              | √              | √              |
| 38         | 71  | MOC                               | IC                           | √                                     | √              | √              |                |
| 39         | 36  | OCCC                              | IV                           | √                                     |                | √              |                |
| 40         | 66  | HGSOC                             | IIIC                         | √                                     | √              | √              | √              |
| 41         | 41  | HGSOC                             | IIIA                         | √                                     |                |                | √              |

|    |    |       |      |   |   |   |   |
|----|----|-------|------|---|---|---|---|
| 42 | 65 | HGSOC | IIIC | √ |   |   |   |
| 43 | 53 | HGSOC | IV   | √ |   | √ | √ |
| 44 | 63 | HGSOC | IIIC | √ | √ |   |   |
| 45 | 57 | HGSOC | IV   | √ | √ | √ |   |
| 46 | 38 | HGSOC | III  | √ | √ | √ | √ |
| 47 | 61 | HGSOC | III  | √ | √ | √ | √ |
| 48 | 73 | HGSOC | IIIC | √ | √ | √ | √ |
| 49 | 48 | HGSOC | IIIC | √ | √ | √ | √ |
| 50 | 35 | HGSOC | IIB  | √ | √ | √ | √ |
| 51 | 64 | HGSOC | IIIC | √ | √ | √ | √ |
| 52 | 66 | HGSOC | IV   |   | √ | √ | √ |
| 53 | 53 | HGSOC | IIIC | √ | √ | √ | √ |
| 54 | 59 | HGSOC | IIIC | √ |   | √ | √ |
| 55 | 44 | HGSOC | IIIC | √ | √ | √ | √ |
| 56 | 64 | HGSOC | IIIC | √ | √ | √ | √ |
| 57 | 66 | LGSOC | IV   | √ | √ | √ | √ |
| 58 | 63 | HGSOC | IIIC | √ | √ | √ | √ |
| 59 | 54 | HGSOC | IIB  | √ | √ |   | √ |
| 60 | 50 | HGSOC | IIIC | √ |   | √ | √ |
| 61 | 44 | HGSOC | IIIC | √ |   | √ | √ |
| 62 | 65 | HGSOC | IV   | √ |   | √ | √ |
| 63 | 56 | HGSOC | IIIC | √ |   | √ | √ |
| 64 | 53 | HGSOC | IIIC | √ | √ | √ | √ |
| 65 | 64 | HGSOC | IIIC | √ | √ | √ | √ |
| 66 | 51 | HGSOC | IIIC | √ | √ | √ | √ |
| 67 | 62 | OCCC  | I    | √ | √ | √ | √ |
| 68 | 53 | OCCC  | IIIC |   |   | √ | √ |

[1] The physiological type was obtained from the pathological examination, including 58 cases of high-grade serous ovarian carcinoma (HGSOC), 5 cases of ovarian clear cell carcinoma (OCCC), 2 cases of mucinous ovarian carcinoma (MOC), 1 case of endometrioid ovarian carcinoma (EOC), and 2 cases of low grade serous ovarian carcinoma (LGSOC).

[2] The disease stage was obtained according to the standards of Federation International of Gynecology and Obstetrics (FIGO) 2018 for ovarian cancer.

[3] The serum sample available for the patient before chemotherapy (Before), after cycle 1 of chemotherapy ( $C_1$ ),  $C_2$ , and  $C_n$  ( $n \geq 5$ ) is marked with '√'.

**Supporting Table 6. The diagnostic parameters of before chemotherapy and chemotherapy cycle 1 (C<sub>1</sub>) by elastic net (EN), least absolute shrinkage and selection operator (LASSO), partial least squares (PLS) regression, and decision tree.**

| <b>Machine learning methods</b> | <b>Diagnostic performance</b> | <b>Training set (before/C<sub>1</sub>, 49/35)</b> | <b>Test set (before/C<sub>1</sub>, 17/12)</b> |
|---------------------------------|-------------------------------|---------------------------------------------------|-----------------------------------------------|
| <b>EN</b>                       | AUC                           | 1.00                                              | 0.74                                          |
|                                 | Sensitivity (%)               | 0.98                                              | 0.59                                          |
|                                 | Specificity (%)               | 1.00                                              | 0.83                                          |
|                                 | Accuracy (%)                  | 0.98                                              | 0.66                                          |
| <b>LASSO</b>                    | AUC                           | 1.00                                              | 0.70                                          |
|                                 | Sensitivity (%)               | 0.96                                              | 0.59                                          |
|                                 | Specificity (%)               | 1.00                                              | 0.83                                          |
|                                 | Accuracy (%)                  | 0.96                                              | 0.66                                          |
| <b>PLS</b>                      | AUC                           | 0.81                                              | 0.78                                          |
|                                 | Sensitivity (%)               | 0.78                                              | 0.65                                          |
|                                 | Specificity (%)               | 0.77                                              | 0.92                                          |
|                                 | Accuracy (%)                  | 0.76                                              | 0.72                                          |
| <b>Decision tree</b>            | AUC                           | 0.92                                              | 0.59                                          |
|                                 | Sensitivity (%)               | 0.84                                              | 0.47                                          |
|                                 | Specificity (%)               | 0.83                                              | 0.67                                          |
|                                 | Accuracy (%)                  | 0.81                                              | 0.55                                          |

**Supporting Table 7. The diagnostic parameters of before chemotherapy and chemotherapy cycle 2 (C<sub>2</sub>) by EN, LASSO, PLS, and decision tree.**

| <b>Machine learning method</b> | <b>Diagnostic performance</b> | <b>Training set (before/C<sub>2</sub>, 49/41)</b> | <b>Test set (before/C<sub>2</sub>, 17/13)</b> |
|--------------------------------|-------------------------------|---------------------------------------------------|-----------------------------------------------|
| <b>EN</b>                      | AUC                           | 0.99                                              | 0.98                                          |
|                                | Sensitivity (%)               | 0.96                                              | 0.83                                          |
|                                | Specificity (%)               | 0.98                                              | 1.00                                          |
|                                | Accuracy (%)                  | 0.95                                              | 0.92                                          |
| <b>LASSO</b>                   | AUC                           | 0.99                                              | 1.00                                          |
|                                | Sensitivity (%)               | 0.96                                              | 0.93                                          |
|                                | Specificity (%)               | 0.96                                              | 1.00                                          |
|                                | Accuracy (%)                  | 0.98                                              | 1.00                                          |
| <b>PLS</b>                     | AUC                           | 0.77                                              | 0.78                                          |
|                                | Sensitivity (%)               | 0.69                                              | 0.70                                          |
|                                | Specificity (%)               | 0.76                                              | 0.88                                          |
|                                | Accuracy (%)                  | 0.63                                              | 0.62                                          |
| <b>Decision tree</b>           | AUC                           | 0.95                                              | 0.94                                          |
|                                | Sensitivity (%)               | 0.82                                              | 0.90                                          |
|                                | Specificity (%)               | 0.92                                              | 0.94                                          |
|                                | Accuracy (%)                  | 0.85                                              | 0.85                                          |



**Supporting Table 8. The diagnostic parameters of before chemotherapy and chemotherapy cycle  $n$  ( $C_n$ ) based on EN, LASSO, PLS, and decision tree.**

| <b>Machine learning method</b> | <b>Diagnostic performance</b> | <b>Training set (before/<math>C_n</math>, 49/57)</b> | <b>Test set (before/<math>C_n</math>, 17/19)</b> |
|--------------------------------|-------------------------------|------------------------------------------------------|--------------------------------------------------|
| <b>EN</b>                      | AUC                           | 0.98                                                 | 0.93                                             |
|                                | Sensitivity (%)               | 0.98                                                 | 0.88                                             |
|                                | Specificity (%)               | 0.96                                                 | 0.89                                             |
|                                | Accuracy (%)                  | 0.96                                                 | 0.86                                             |
| <b>LASSO</b>                   | AUC                           | 0.98                                                 | 0.89                                             |
|                                | Sensitivity (%)               | 0.94                                                 | 0.76                                             |
|                                | Specificity (%)               | 0.96                                                 | 0.89                                             |
|                                | Accuracy (%)                  | 0.94                                                 | 0.81                                             |
| <b>PLS</b>                     | AUC                           | 0.80                                                 | 0.89                                             |
|                                | Sensitivity (%)               | 0.73                                                 | 0.94                                             |
|                                | Specificity (%)               | 0.77                                                 | 0.74                                             |
|                                | Accuracy (%)                  | 0.75                                                 | 0.75                                             |
| <b>Decision tree</b>           | AUC                           | 0.94                                                 | 0.89                                             |
|                                | Sensitivity (%)               | 0.86                                                 | 0.88                                             |
|                                | Specificity (%)               | 0.88                                                 | 0.84                                             |
|                                | Accuracy (%)                  | 0.84                                                 | 0.86                                             |

**Supporting Table 9. The potential biomarkers selected from SMFs.**

| No. | Metabolite <sup>[1]</sup>                    | HMDB ID <sup>[2]</sup> | m/z    | Adduct             | $p_1$ <sup>[3]</sup> | $p_2$ <sup>[4]</sup> | $p_3$ <sup>[5]</sup> |
|-----|----------------------------------------------|------------------------|--------|--------------------|----------------------|----------------------|----------------------|
| 1   | Hydroxybutyric acid                          | HMDB0001352            | 103.95 | [M] <sup>+</sup>   | **                   | **                   | ****                 |
| 2   | Maleic acid                                  | HMDB0000176            | 116.84 | [M+H] <sup>+</sup> | *                    | **                   | ****                 |
| 3   | D-Cysteine                                   | HMDB0003417            | 121.96 | [M+H] <sup>+</sup> | ***                  | ****                 | ****                 |
| 4   | N-Acetylasparagine                           | HMDB0006028            | 212.95 | [M+K] <sup>+</sup> | **                   | **                   | ****                 |
| 5   | 3-Hydroxy-2-methylpyridine-4,5-dicarboxylate | HMDB0006955            | 235.95 | [M+K] <sup>+</sup> | **                   | ***                  | ****                 |
| 6   | Dihydroneopterin phosphate                   | HMDB0006824            | 335.85 | [M+H] <sup>+</sup> | *                    | ***                  | ****                 |

<sup>[1]</sup> The metabolites include hydroxybutyric acid, maleic acid, D-cysteine, N-acetylasparagine, 3-hydroxy-2-methylpyridine-4,5-dicarboxylate, and dihydroneopterin phosphate, which were screened out by machine learning methods and constructed as the metabolic biomarker panel for chemotherapy monitoring.

<sup>[2]</sup> refers to the ID of the corresponding metabolite in the human metabolite database (<https://hmdb.ca/>).

<sup>[3]</sup> The  $p_1$  value was calculated by the t-test based on the intensities between ovarian cancer patients before chemotherapy and after cycle 1 chemotherapy ( $C_1$ ) at the corresponding m/z value.

<sup>[4]</sup> The  $p_2$  value was calculated by the t-test based on the intensities between ovarian cancer patients before chemotherapy and after cycle 2 chemotherapy ( $C_2$ ) at the corresponding m/z value.

<sup>[5]</sup> The  $p_3$  value was calculated by the t-test based on the intensities between ovarian cancer patients before chemotherapy and after cycle  $n$  chemotherapy ( $C_n$ ,  $n \geq 5$ ) at corresponding m/z value. (\* represented  $p < 0.05$ , \*\* represented  $p < 0.01$ , \*\*\* represented  $p < 0.001$ , and \*\*\*\* represented  $p < 0.0001$ ).

**Supporting Table 10. The statistics of potential biomarkers after variable cycle of chemotherapy.**

| No. | Metabolite                                   | <i>p</i> (C <sub>1</sub> vs C <sub>n</sub> ) | <i>p</i> (C <sub>2</sub> vs C <sub>n</sub> ) | Fold change <sup>[1]</sup> | Log <sub>2</sub> (Fold change)<br><sup>[1]</sup> |
|-----|----------------------------------------------|----------------------------------------------|----------------------------------------------|----------------------------|--------------------------------------------------|
| 1   | Hydroxybutyric acid                          | *                                            | *                                            | 1.43                       | 0.51                                             |
| 2   | Maleic acid                                  | *                                            | *                                            | 1.93                       | 0.95                                             |
| 3   | D-Cysteine                                   | **                                           | 0.06                                         | 2.09                       | 1.06                                             |
| 4   | N-Acetylasparagine                           | *                                            | *                                            | 2.58                       | 1.37                                             |
| 5   | 3-Hydroxy-2-methylpyridine-4,5-dicarboxylate | **                                           | *                                            | 1.86                       | 0.89                                             |
| 6   | Dihydroneopterin phosphate                   | *                                            | *                                            | 1.65                       | 0.73                                             |

<sup>[1]</sup> The fold change analysis was conducted based on the SMFs of ovarian cancer patients before and after chemotherapy.

## References

1. Wang, X.; Yao, W.; Guo, R.; Yang, X.; Tang, J.; Zhang, J.; Gao, W.; Timchenko, V.; Liu, J., Soft and Moldable Mg-Doped Liquid Metal for Conformable Skin Tumor Photothermal Therapy. *Adv. Healthc. Mater.* **2018**, *7* (14), 1800318.
2. Chen, X.; Zhang, Q.; Li, J.; Yang, M.; Zhao, N.; Xu, F.-J., Rattle-Structured Rough Nanocapsules with in-Situ-Formed reil Gold Nanorod Cores for Complementary Gene/Chemo/Photothermal Therapy. *ACS Nano* **2018**, *12* (6), 5646-5656.
3. Song, J.; Yang, X.; Yang, Z.; Lin, L.; Liu, Y.; Zhou, Z.; Shen, Z.; Yu, G.; Dai, Y.; Jacobson, O.; Munasinghe, J.; Yung, B.; Teng, G.-J.; Chen, X., Rational Design of Branched Nanoporous Gold Nanoshells with Enhanced Physico-Optical Properties for Optical Imaging and Cancer Therapy. *ACS Nano* **2017**, *11* (6), 6102-6113.
4. Niu, Y.; Yu, M.; Hartono, S. B.; Yang, J.; Xu, H.; Zhang, H.; Zhang, J.; Zou, J.; Dexter, A.; Gu, W.; Yu, C., Nanoparticles Mimicking Viral Surface Topography for Enhanced Cellular Delivery. *Adv. Mater.* **2013**, *25* (43), 6233-6237.
5. Kocer, G.; ter Schiphorst, J.; Hendrikx, M.; Kassa, H. G.; Leclere, P.; Schenning, A. P. H. J.; Jonkheijm, P., Light-Responsive Hierarchically Structured Liquid Crystal Polymer Networks for Harnessing Cell Adhesion and Migration. *Adv. Mater.* **2017**, *29* (27), 1606407.
6. Zhou, Q.; Xie, J.; Bao, M.; Yuan, H.; Ye, Z.; Lou, X.; Zhang, Y., Engineering aligned electrospun PLLA microfibers with nano-porous surface nanotopography for modulating the responses of vascular smooth muscle cells. *J. Mat. Chem. B* **2015**, *3* (21), 4439-4450.
7. Li, S.; Zhao, S.; Pei, J.; Wang, H.; Meng, H.; Vrouwenvelder, J. S.; Li, Z., Stimuli-Responsive Lysozyme Nanocapsule Engineered Microfiltration Membranes with a Dual-Function of Anti-Adhesion and Antibacteria for Biofouling Mitigation. *ACS Appl. Mater. Interfaces* **2021**, *13* (27), 32205-32216.
8. Xu, Y.; Wen, W.; Wu, J.-M., Titania nanowires functionalized polyester fabrics with enhanced photocatalytic and antibacterial performances. *J. Hazard. Mater.* **2018**, *343*, 285-297.
9. Nguyen, D. H. K.; Loebbe, C.; Linklater, D. P.; Xu, X.; Vrancken, N.; Katkus, T.; Juodkazis, S.; Maclaughlin, S.; Baulin, V.; Crawford, R. J.; Ivanova, E. P., The idiosyncratic self-cleaning cycle of bacteria on regularly arrayed mechano-bactericidal nanostructures. *Nanoscale* **2019**, *11* (35), 16455-16462.
10. Shi, J.; Wang, L.; Dai, Z.; Zhao, L.; Du, M.; Li, H.; Fang, Y., Multiscale Hierarchical Design of a Flexible Piezoresistive Pressure Sensor with High Sensitivity and Wide Linearity Range. *Small* **2018**, *14* (27).
11. Qi, Y.; Cao, Y.; Meng, X.; Cao, J.; Li, X.; Hao, Q.; Lei, W.; Li, Q.; Li, J.; Si, W., Facile synthesis of 3D sulfur/nitrogen co-doped graphene derived from graphene oxide hydrogel and the simultaneous determination of hydroquinone and catechol. *Sens. Actuators B Chem.* **2019**, *279*, 170-176.
12. Shu, W.; Wang, Y.; Liu, C.; Li, R.; Pei, C.; Lou, W.; Lin, S.; Di, W.; Wan, J., Construction of a Plasmonic Chip for Metabolic Analysis in Cervical Cancer Screening and Evaluation. *Small Methods* **2020**, *4* (4), 1900469.
13. Tseng, Y.-T.; Chang, H.-Y.; Harroun, S. G.; Wu, C.-W.; Wei, S.-C.; Yuan, Z.; Chou, H.-L.; Chen, C.-H.; Huang, C.-C.; Chang, H.-T., Self-Assembled Chiral Gold Supramolecules with Efficient Laser Absorption for Enantiospecific Recognition of Carnitine. *Anal. Chem.* **2018**, *90* (12), 7283-7291.
14. Yoon, S.; Park, S.; Kim, M. S.; Lee, C. Y., Concomitant desalting and concentration of neuropeptides on a donut-shaped surface pattern for MALDI mass spectrometry. *ChemComm*

**2018**, *54* (45), 5688-5691.

15. Li, W.; Khan, M.; Li, H.; Lin, L.; Mao, S.; Lin, J.-M., Homogenous deposition of matrix-analyte cocrystals on gold-nanobowl arrays for improving MALDI-MS signal reproducibility. *ChemComm* **2019**, *55* (15), 2166-2169.

16. Ge, K.; Peng, Y.; Lu, Z.; Hu, Y.; Li, G., Aptamer-gold nanoparticle doped covalent organic framework followed by matrix-assisted laser desorption/ionization time-of-flight mass spectrometry for selective enrichment and detection of human insulin. *J. Chromatogr. A* **2020**, *1615*.

17. Huang, S.; Chen, G.; Ou, R.; Qin, S.; Wang, F.; Zhu, F.; Ouyang, G., Ultrathin Self-Assembled Diphenylalanine Nanosheets through a Gold-Stabilized Strategy for High-Efficiency Adsorption/Desorption/Ionization. *Anal. Chem.* **2018**, *90* (14), 8607-8615.

18. Wang, X.-N.; Tang, W.; Gordon, A.; Wang, H.-Y.; Xu, L.; Li, P.; Li, B., Porous TiO<sub>2</sub> Film Immobilized with Gold Nanoparticles for Dual-Polarity SALDI MS Detection and Imaging. *ACS Appl. Mater. Interfaces* **2020**, *12* (38), 42567-42575.

19. Kim, M.-J.; Yun, T. G.; Noh, J.-Y.; Kang, M.-J.; Pyun, J.-C., Photothermal Structural Dynamics of Au Nanofurnace for In Situ Enhancement in Desorption and Ionization. *Small* **2021**, *17* (49), 2103745.

20. Kim, M.-J.; Yun, T. G.; Noh, J.-Y.; Song, Z.; Kim, H.-R.; Kang, M.-J.; Pyun, J.-C., Laser-Induced Surface Reconstruction of Nanoporous Au-Modified TiO<sub>2</sub> Nanowires for In Situ Performance Enhancement in Desorption and Ionization Mass Spectrometry. *Adv. Funct. Mater.* **2021**, *31* (29), 2102475.

21. Kim, M.-J.; Yun, T. G.; Noh, J.-Y.; Park, J.-M.; Kang, M.-J.; Pyun, J.-C., Synergistic Effect of the Heterostructure of Au Nanoislands on TiO<sub>2</sub> Nanowires for Efficient Ionization in Laser Desorption/Ionization Mass Spectrometry. *ACS Appl. Mater. Interfaces* **2019**, *11* (22), 20509-20520.

22. Li, L.; Qiu, Z.; Qi, Y.; Zhao, D.; Ali, I.; Sun, C.; Xu, L.; Zheng, Z.; Ma, C., AuNPs/NiFe-LDHs-assisted laser desorption/ionization mass spectrometry for efficient analysis of metronidazole and its metabolites in water samples. *J. Hazard. Mater.* **2022**, *423*, 126893.

23. Alexandra Iakab, S.; Rafols, P.; Tajés, M.; Correig-Blanchar, X.; Garcia-Altres, M., Gold Nanoparticle-Assisted Black Silicon Substrates for Mass Spectrometry Imaging Applications. *ACS Nano* **2020**, *14* (6), 6785-6794.
